# Supplementary material for: Quantitation of DNA methylation in Epstein-Barr virus–associated nasopharyngeal carcinoma by bisulfite amplicon sequencing
Source: BMC Cancer. 2017 Jul 17;17:489. doi: 10.1186/s12885-017-3482-3 (PMC5514474; doi:10.1186/s12885-017-3482-3)
Supplement: Supplementary file 2 — Summary of candidate genes from Methyl-Cap sequencing and cDNA microarray data. (XLSX 24 kb) [file 12885_2017_3482_MOESM2_ESM.xlsx]

## Sheet: Sheet1
Supplementary Table S1. Summary of candidate genes from Methyl Cap sequencing and cDNA microarray data
CpG island ID	Transcript ID of candidate gene	Gene Symbol	Expression (NPC/NNE) in log2 scale	p-value for expression difference	DMR (NPC/NNE)	p-value for methylation difference
chr4:42399152-42400802_CpG:_153	NM_001080505	SHISA3	-3.22757	0.0144487	88.9956	0.00252525
chr6:86159425-86160395_CpG:_104	NM_002526	NT5E	-1.70393	0.0089822	55.225	0.00252525
chr17:8054550-8055835_CpG:_89	NM_002616	PER1	-1.58671	0.0125811	48.1992	0.00252525
chr19:58038572-58039208_CpG:_64	NM_153263	ZNF549	-1.38512	0.0142944	42.9109	0.010101
chr6:4135175-4136460_CpG:_94	NM_206836	ECI2	-1.12047	0.0207535	33.0524	0.00252525
chr1:107682889-107684463_CpG:_134	NM_014917	NTNG1	-1.32734	0.00016189	28.5015	0.00252525
chr4:81951941-81952808_CpG:_88	NM_001201	BMP3	-2.65333	0.0026464	22.3885	0.00252525
chr10:98945062-98946239_CpG:_108	NM_003061	SLIT1	-2.07806	0.00504625	22.1858	0.00505051
chr13:33589928-33591428_CpG:_147	NM_004795	KL	-1.49843	0.0423638	20.0174	0.010101
chr13:46960684-46961670_CpG:_93	NM_025113	C13orf18	-2.27907	0.0393806	19.4848	0.00505051
chr5:17217788-17219021_CpG:_88	NM_006317	BASP1	-1.43489	0.00966555	18.657	0.0479798
chr17:46114573-46115059_CpG:_44	NR_029687	MIR152	-1.32329	0.0433457	18.224	0.010101
chr15:45669970-45671029_CpG:_98	NM_001482	GATM	-1.79521	0.0135752	17.9108	0.00505051
chr17:48585385-48586167_CpG:_68	NM_032133	MYCBPAP	-1.86432	0.0480787	17.8238	0.00252525
chr19:39897241-39898942_CpG:_109	NM_003407	ZFP36	-1.63001	0.0343335	17.4338	0.00252525
chr1:169396621-169396869_CpG:_20	NM_021179	C1orf114	-3.16541	0.0137767	17.3493	0.00252525
chr18:44336183-44337110_CpG:_94	NM_013305	ST8SIA5	-1.20337	0.0291498	16.6556	0.010101
chr3:137833848-137834592_CpG:_78	NM_173543	DZIP1L	-2.22909	0.0349715	16.538	0.0176768
chr10:94448693-94450479_CpG:_191	NM_002729	HHEX	-1.87945	0.0249766	16.0597	0.00252525
chr11:75378416-75379882_CpG:_152	NM_033063	MAP6	-3.88895	0.00701019	15.9952	0.00252525
chr11:75378416-75379882_CpG:_152	NM_207577	MAP6	-2.67254	0.0141684	15.9952	0.00252525
chr2:230578062-230579981_CpG:_164	NM_139072	DNER	-3.08059	0.000836886	15.779	0.00252525
chr5:149339931-149340951_CpG:_102	NM_000112	SLC26A2	-1.14653	0.0424054	14.9257	0.00505051
chr6:138482534-138483710_CpG:_114	NM_020340	KIAA1244	-2.31386	0.0308946	14.7435	0.00252525
chr16:3355020-3356012_CpG:_111	NM_033208	TIGD7	-1.36273	0.0429622	14.3573	0.010101
chr19:58238585-58239028_CpG:_42	NM_024833	ZNF671	-1.79644	0.0338272	13.829	0.00252525
chr2:56410865-56412539_CpG:_147	NM_001080433	CCDC85A	-1.26586	0.00225917	13.3317	0.00252525
chr2:85980499-85982198_CpG:_166	NM_032827	ATOH8	-1.80726	0.0122323	13.2619	0.00505051
chr17:7554139-7555338_CpG:_112	NM_001678	ATP1B2	-1.24677	0.0493205	12.9187	0.00252525
chr1:48937304-48937683_CpG:_28	NM_019073	SPATA6	-1.87734	0.00467606	12.8732	0.00505051
chr7:1126578-1126910_CpG:_29	NM_001039966	GPER	-1.08451	0.00474762	12.1567	0.00252525
chr19:58220189-58220517_CpG:_31	NM_001085384	ZNF154	-1.46391	0.00236269	11.9618	0.00505051
chr3:142442702-142443978_CpG:_97	NM_003304	TRPC1	-1.83071	0.000594354	11.4833	0.00252525
chr19:56879417-56879995_CpG:_57	NR_003127	ZNF542	-1.69993	0.00869929	11.3087	0.00252525
chr6:29759946-29760903_CpG:_78	NR_002139	HCG4	-1.75582	0.00333299	10.8408	0.010101
chr19:38182793-38183327_CpG:_47	NM_152605	ZNF781	-1.81713	0.00193856	10.7679	0.010101
chr2:68546339-68547111_CpG:_75	NM_015463	CNRIP1	-1.88259	0.00802491	10.755	0.0176768
chr7:87256958-87258444_CpG:_132	NM_138290	RUNDC3B	-1.97851	0.0136841	10.6832	0.00252525
chr4:109093038-109094546_CpG:_136	NR_029373	LOC641518	-1.28611	0.00469949	10.4841	0.010101
chr17:4542715-4544934_CpG:_146	NM_001140	ALOX15	-3.61456	0.0147192	10.3916	0.0479798
chr7:30028518-30029822_CpG:_133	NM_014766	SCRN1	-1.0891	0.0154133	10.2552	0.00252525
chr17:59488115-59490485_CpG:_229	NM_203425	C17orf82	-1.39477	0.0271085	10.0552	0.00505051
chr10:99078811-99081048_CpG:_182	NM_005479	FRAT1	-1.83775	0.000175071	9.94636	0.010101
chr19:53141175-53141813_CpG:_46	NM_001105549	ZNF83	-1.3945	0.0095786	9.54769	0.00252525
chr9:131464843-131465830_CpG:_89	NM_013355	PKN3	-1.1724	0.0370376	9.50169	0.010101
chr8:37654048-37656100_CpG:_175	NM_032777	GPR124	-1.07832	0.0167675	9.29215	0.00252525
chr4:47838604-47839946_CpG:_95	NM_006587	CORIN	-2.08568	0.00486595	9.25469	0.030303
chr19:36909281-36909854_CpG:_66	NM_133466	ZFP82	-1.76539	0.045217	8.80108	0.00252525
chr2:122042066-122043093_CpG:_112	NM_014553	TFCP2L1	-2.69114	0.0129865	8.76611	0.00252525
chr2:219906107-219906328_CpG:_19	NM_194302	CCDC108	-2.7754	0.0206102	8.61251	0.0176768
chr3:169529875-169530435_CpG:_58	NM_153353	LRRC34	-3.16441	0.0116941	8.58896	0.0176768
chr9:72286804-72288081_CpG:_110	NM_001163	APBA1	-1.17529	0.0434779	8.50101	0.030303
chr5:178450630-178451216_CpG:_73	NM_001136116	ZNF879	-1.23995	0.0021387	8.50099	0.00252525
chr2:182321761-182323029_CpG:_119	NM_000885	ITGA4	-1.36439	0.0395236	8.43077	0.00252525
chr6:151561283-151562550_CpG:_132	NM_005100	AKAP12	-1.52414	0.0014077	7.71161	0.00252525
chr14:24803678-24804353_CpG:_59	NM_139247	ADCY4	-1.30334	0.0116939	7.7108	0.010101
chr3:123602588-123603540_CpG:_68	NM_053025	MYLK	-1.26502	0.0070696	7.68214	0.00505051
chr16:15489526-15490075_CpG:_69	NM_173803	MPV17L	-1.88436	0.0189821	7.41557	0.00505051
chr10:23727836-23729523_CpG:_170	NM_001145373	OTUD1	-1.08718	0.0171612	7.41554	0.030303
chr3:170136242-170137886_CpG:_132	NM_005602	CLDN11	-1.53516	0.0416744	7.15071	0.00252525
chr17:72270301-72270512_CpG:_27	NM_023036	DNAI2	-3.58071	0.00221722	6.98446	0.010101
chr11:86382695-86383586_CpG:_82	NM_001014811	ME3	-2.3378	0.00264037	6.98153	0.030303
chr9:79520803-79521508_CpG:_75	NM_015225	PRUNE2	-2.39641	0.0254355	6.93124	0.010101
chr12:15373986-15374514_CpG:_49	NM_032918	RERG	-1.9031	0.00224011	6.8749	0.010101
chr19:46974557-46975073_CpG:_52	NM_018215	PNMAL1	-3.90502	0.000569377	6.73064	0.010101
chr8:121137099-121137778_CpG:_50	NM_021110	COL14A1	-1.79963	0.00673235	6.66465	0.00505051
chr1:220863507-220864249_CpG:_84	NM_024709	C1orf115	-2.40889	0.00151491	6.60769	0.010101
chr1:207627531-207628280_CpG:_72	NM_001006658	CR2	-3.81865	0.0230113	6.60594	0.00505051
chr1:177133392-177133846_CpG:_44	NM_207108	ASTN1	-2.05879	0.0017528	6.60293	0.00505051
chr1:177133392-177133846_CpG:_44	NM_004319	ASTN1	-1.66577	0.000528892	6.60293	0.00505051
chr5:115151348-115152713_CpG:_122	NM_001801	CDO1	-4.18631	0.000707617	6.48462	0.010101
chr16:15528350-15529086_CpG:_60	NM_033201	C16orf45	-1.39627	0.0162693	6.45937	0.0479798
chr14:69726250-69728393_CpG:_213	NM_020692	GALNTL1	-2.93774	0.00140378	6.21903	0.0479798
chr17:21279506-21281574_CpG:_187	NM_021012	KCNJ12	-3.13677	0.00603873	6.21903	0.00505051
chr22:24199058-24200206_CpG:_98	NM_030807	SLC2A11	-1.50589	0.0320717	6.11783	0.00252525
chr14:52780687-52781969_CpG:_129	NM_000956	PTGER2	-1.59984	0.00749559	6.07085	0.010101
chr19:53662189-53662500_CpG:_33	NM_032584	ZNF347	-1.70111	0.00597061	6.00042	0.0176768
chr11:6676496-6677096_CpG:_74	NM_003737	DCHS1	-1.34558	0.0235736	5.97027	0.0176768
chr4:102711829-102712199_CpG:_35	NM_017935	BANK1	-2.77688	0.0336817	5.83729	0.00252525
chr2:228736230-228736544_CpG:_33	NM_178821	WDR69	-3.18857	0.0354503	5.78309	0.010101
chr4:143766940-143768413_CpG:_121	NM_003866	INPP4B	-1.45953	0.0189781	5.74165	0.0479798
chr17:72321948-72322461_CpG:_61	NM_153209	KIF19	-3.02753	0.0121305	5.66731	0.0479798
chr4:121992003-121993703_CpG:_143	NM_024574	C4orf31	-1.12009	0.0223051	5.64226	0.0176768
chr14:62583679-62584279_CpG:_54	NR_015358	FLJ43390	-1.98078	0.00059025	5.63723	0.00252525
chr3:180397104-180397877_CpG:_54	NM_181426	CCDC39	-2.68998	0.0179681	5.40721	0.0479798
chr11:22214172-22215320_CpG:_89	NM_213599	ANO5	-2.17339	0.00197489	5.38281	0.030303
chr7:103629525-103630652_CpG:_128	NM_005045	RELN	-1.28189	0.00130815	5.33797	0.030303
chr17:12692737-12693690_CpG:_105	NM_014859	ARHGAP44	-2.51322	0.00598791	5.23725	0.00252525
chr14:31343355-31344757_CpG:_133	NM_004086	COCH	-2.12887	0.0159257	5.224	0.0479798
chr16:15950839-15951266_CpG:_44	NM_001040114	MYH11	-4.52657	0.000657938	5.20305	0.010101
chr16:15950839-15951266_CpG:_44	NM_001040113	MYH11	-4.06243	0.000914533	5.20305	0.010101
chr2:26785114-26785687_CpG:_58	NM_001105519	C2orf70	-1.67199	0.0168543	5.14822	0.0479798
chr8:110703409-110703897_CpG:_44	NM_001099744	SYBU	-2.58776	0.00175821	5.12758	0.030303
chr18:67067509-67069168_CpG:_170	NM_152721	DOK6	-1.20121	0.00536612	5.1086	0.010101
chr2:210636344-210636935_CpG:_59	NM_032504	UNC80	-1.24955	0.0448827	5.07873	0.0176768
chr5:131346892-131347776_CpG:_87	NM_001009185	ACSL6	-1.77876	0.00719762	5.07106	0.00252525
chr1:156890243-156890806_CpG:_61	NM_144702	LRRC71	-2.98749	0.0165263	5.02706	0.00505051
chr3:32279423-32280742_CpG:_118	NM_178868	CMTM8	-1.73479	0.00982231	4.98682	0.0176768
chr7:4922707-4923576_CpG:_103	NM_018059	RADIL	-1.97346	0.0035177	4.98682	0.030303
chr19:58094739-58095764_CpG:_88	NM_001010879	ZIK1	-1.18564	0.0217189	4.97323	0.00505051
chr1:109656095-109656611_CpG:_48	NM_001122961	C1orf194	-4.55961	0.0128197	4.96412	0.0176768
chr9:21031513-21031823_CpG:_32	NM_001010915	PTPLAD2	-1.11754	0.0197082	4.85957	0.0176768
chr6:84417597-84419378_CpG:_185	NM_014841	SNAP91	-1.85254	0.0223002	4.60317	0.00505051
chr19:16435202-16438064_CpG:_239	NM_016270	KLF2	-1.94549	0.00781841	4.47126	0.0479798
chr18:904578-909574_CpG:_330	NM_001099733	ADCYAP1	-2.40226	0.00364669	4.42165	0.0479798
chr4:3464799-3465440_CpG:_55	NM_173660	DOK7	-2.00441	0.000887571	4.42063	0.0176768
chr11:61275825-61277329_CpG:_174	NM_001145077	LRRC10B	-3.79472	0.0306038	4.33632	0.0176768
chr1:151693991-151694282_CpG:_25	NM_001144956	RIIAD1	-3.08853	0.0223908	4.33436	0.010101
chr22:23483997-23484309_CpG:_28	NM_014433	RTDR1	-2.46606	0.0183959	4.26539	0.030303
chr2:237416090-237416382_CpG:_41	NM_024726	IQCA1	-2.43037	0.0442977	4.1583	0.00252525
chr16:23724270-23724775_CpG:_46	NM_033266	ERN2	-3.39832	0.0295619	4.09381	0.030303
chr7:48074838-48075985_CpG:_104	NM_001100159	C7orf57	-3.02632	0.00308532	4.05125	0.0479798
chr16:23765969-23766869_CpG:_86	NM_022097	CHP2	-2.74822	0.0234365	3.98586	0.00252525
chr3:125898662-125899568_CpG:_73	NM_012190	ALDH1L1	-3.46673	0.0301721	3.96909	0.010101
chr1:38099677-38100864_CpG:_112	NM_001038633	RSPO1	-2.26704	0.00866761	3.92125	0.0176768
chr6:24910626-24911285_CpG:_47	NM_014722	FAM65B	-2.36729	0.014939	3.82777	0.030303
chr8:55370170-55372525_CpG:_233	NM_022454	SOX17	-1.10942	0.0314103	3.80978	0.030303
chr19:57078365-57079301_CpG:_82	NM_001001668	ZNF470	-1.19602	0.0119777	3.75417	0.0176768
chr11:130297401-130298517_CpG:_113	NM_007037	ADAMTS8	-1.79996	0.0011825	3.73221	0.0176768
chr7:95225503-95226194_CpG:_60	NM_002612	PDK4	-2.3927	0.000360832	3.70778	0.0479798
chr16:66958733-66959655_CpG:_101	NM_004165	RRAD	-4.27819	0.0141434	3.69763	0.00252525
chr6:43612714-43613366_CpG:_53	NM_152732	RSPH9	-2.58463	0.0223443	3.6413	0.030303
chr2:183730808-183731357_CpG:_38	NM_001463	FRZB	-2.12658	0.000886655	3.62558	0.00252525
chr3:59035406-59035944_CpG:_57	NM_198463	C3orf67	-2.42538	0.00321733	3.58501	0.0176768
chr22:20790638-20792665_CpG:_145	NM_153334	SCARF2	-1.82682	0.0128452	3.55448	0.010101
chr19:53635625-53636230_CpG:_45	NM_001136038	ZNF415	-2.3345	0.00116143	3.53924	0.0176768
chr19:3785511-3786653_CpG:_110	NM_139355	MATK	-1.51023	0.0199031	3.48828	0.00252525
chr17:15244705-15245126_CpG:_36	NM_031898	TEKT3	-1.66028	0.0463858	3.46907	0.010101
chr8:67344497-67344989_CpG:_51	NM_144650	ADHFE1	-1.89662	0.0154348	3.46561	0.030303
chr1:205537751-205538443_CpG:_60	NM_181644	MFSD4	-2.28367	0.00632372	3.45463	0.0176768
chr10:82116202-82117120_CpG:_93	NM_138812	DYDC1	-2.21153	0.0265782	3.40088	0.0479798
chr11:133938850-133939681_CpG:_77	NM_032801	JAM3	-2.20729	0.00244525	3.37348	0.010101
chr8:144240761-144242113_CpG:_132	NM_002347	LY6H	-2.00462	0.017173	3.36033	0.010101
chr8:4848968-4852635_CpG:_253	NM_033225	CSMD1	-1.33373	0.0455638	3.33446	0.030303
chr5:136834016-136835146_CpG:_134	NM_004598	SPOCK1	-1.98056	0.00985728	3.32957	0.030303
chr2:233497826-233499727_CpG:_179	NM_025202	EFHD1	-1.77209	0.00958601	3.29327	0.010101
chr17:6945389-6947521_CpG:_168	NM_153357	SLC16A11	-1.03014	0.00774208	3.25907	0.030303
chr2:177014948-177015214_CpG:_18	NR_029609	MIR10B	-1.53686	0.0445576	3.22304	0.010101
chr19:19006031-19007546_CpG:_131	NM_198207	LASS1	-1.52951	0.00899658	3.21424	0.00252525
chr1:159141202-159141718_CpG:_46	NM_021189	CADM3	-2.87552	0.0246048	3.19904	0.030303
chr2:211089413-211090176_CpG:_85	NM_001608	ACADL	-1.4747	0.0417517	3.19903	0.010101
chr21:36041305-36043224_CpG:_204	NM_053277	CLIC6	-3.03741	0.0323393	3.14105	0.030303
chr6:168841818-168843100_CpG:_125	NM_022138	SMOC2	-2.00216	7.54775e-05	3.09749	0.0479798
chr2:26624603-26625057_CpG:_44	NM_145038	CCDC164	-4.81543	0.0100411	3.08946	0.0479798
chr11:7041072-7041949_CpG:_66	NM_013249	ZNF214	-1.97137	0.00911331	3.05933	0.0479798
chr10:81892222-81892640_CpG:_48	NM_001012973	PLAC9	-2.34542	0.00457279	3.03113	0.030303
chr12:51818460-51819166_CpG:_71	NM_001039960	SLC4A8	-1.95739	0.0133904	3.02607	0.0176768
chr12:3862068-3862606_CpG:_53	NM_032680	EFCAB4B	-2.55133	0.0150676	3.02341	0.0479798
chr4:53728037-53729000_CpG:_106	NM_023940	RASL11B	-1.78389	0.00169773	3.01256	0.010101
chr9:36036798-36037564_CpG:_73	NM_021111	RECK	-1.56532	0.00959543	3.00276	0.00252525
Seven candidate genes are in bold.
